# Supplementary material for: <b>ReFDash - </b>A <strong>Re</strong>pository of <strong>F</strong>unctional <strong>Dash</strong>boards providing comprehensive functional insights inferred from 16S microbiome data sets
Source: Preprints.org preprint supplement (doi:10.20944/preprints201909.0070.v1), 2019-09-06
Supplement: Supplementary file 3 [file supplementary]

## Sheet: Sheet1
Supplementary Table 1
Title	"Study ID"	Host Category	Sub Category	Samples	Geography	Journal_doi	Source
FMT CDI	"6cfdb27c3b"	Human	Stool	100	USA	http://dx.doi.org/10.1093/cid/ciu135	10.1038/s41467-017-01973-8
Pre-term Birth	"3fafe4b000"	Human	Urine	100	USA	http://dx.doi.org/10.1371/journal.pone.0162302	Processed
Complete logMPIE	"3562abc4d0"	Human	Stool	1004	India	http://dx.doi.org/10.1038/sdata.2018.232	10.1038/sdata.2018.232
Colorectal Cancer (CRC)	"c6183c3525"	Human	Stool	101	China	http://dx.doi.org/10.1038/ismej.2011.109	10.1038/s41467-017-01973-8
Obesity Gut Microbiome	"95198329cc"	Human	Stool	1017	USA	http://dx.doi.org/10.1016/j.cell.2014.09.053	10.1038/s41467-017-01973-8
Autism Spectrum Disorder	"a5cff5928a"	Human	Stool	103	USA	http://dx.doi.org/10.1371/journal.pone.0137725	10.1038/s41467-017-01973-8
Type 1 Diabetes	"618c4245bc"	Human	Stool	111	USA	http://dx.doi.org/10.2337/db14-1847	10.1038/s41467-017-01973-8
Arthritis Microbiome	"1f6a1c824c"	Human	Stool	114	USA	http://dx.doi.org/10.7554/eLife.01202	Processed
IBD Phenotypes	"1a936a4837"	Human	Stool	128	Sweden	http://dx.doi.org/10.1053/j.gastro.2010.08.049	10.1038/s41467-017-01973-8
Human Microbiome Project (HMP)	"ee93f92f95"	Human	Oral	1346	USA	https://www.hmpdacc.org/HM16STR/	https://www.hmpdacc.org/HM16STR/
Parkinson's Disease	"81fd0a18ec"	Human	Gut	148	Finland	https://doi.org/10.1002/mds.26069	Processed
Temperate Bog Lakes	"6318fe0e9e"	Environment	Fresh-water	1505	USA	https://doi.org/10.1128/mSystems.00232-18	EBI
Colorectal Cancer (CRC)	"529241e289"	Human	Stool	156	France	http://dx.doi.org/10.15252/msb.20145645	10.1038/s41467-017-01973-8
Sexual Preference and HIV Infection	"a59aa59b34"	Human	Stool	350	Sweden and Spain	http://dx.doi.org/10.1093/infdis/jiu409	10.1038/s41467-017-01973-8
Chronic HIV Infection	"edeb583dad"	Human	Stool	36	USA	http://dx.doi.org/10.1093/infdis/jiu409	10.1038/s41467-017-01973-8
Human Microbiome Project (HMP)	"0b3dd8c433"	Human	Vagina	225	USA	https://www.hmpdacc.org/HM16STR/	https://www.hmpdacc.org/HM16STR/
IBD Huttenhower	"bc56e75f28"	Human	Stool and Tissue	228	USA	http://dx.doi.org/10.1186/gb-2012-13-9-r79	Processed
Skin Microbiome Psoriasis	"c01bc8c4e9"	Human	Skin	236	USA	https://microbiomejournal.biomedcentral.com/articles/10.1186/2049-2618-1-31	Processed
Obesity Gut Microbiome	"45cb0b3f7b"	Human	Stool	281	USA	http://dx.doi.org/10.1016/j.cell.2014.09.053	10.1038/s41467-017-01973-8
Type 1 Diabetes	"f3e0a275fe"	Human	Stool	29	Mexico	https://www.ncbi.nlm.nih.gov/pubmed/24448554	10.1038/s41467-017-01973-8
Acute Enteric Infections	"0dd4a4fb38"	Human	Stool	304	USA	http://dx.doi.org/10.1186/s40168-015-0109-2	10.1186/s40168-015-0109-2
Obesity Gut Microbiome	"050bdf0b61"	Human	Stool	321	USA	http://dx.doi.org/10.1371/journal.pone.0043052	10.1038/s41467-017-01973-8
TwinsUK Cohort Microbiome	"f8f993ad6c"	Human	Gut	3288	United Kingdom (UK)	https://doi.org/10.1016/j.chom.2016.04.017	EBI
Cow Rumen bacteriome	"bbf563edda"	Cow	Rumen	334	China	https://doi.org/10.1038/sdata.2018.301	10.1038/sdata.2018.301
Home Microbiome Project	"6b68f0f83a"	Human	BodysitesEnvironment	1625	USA	https://doi.org/10.1126/science.1254529	EBI
Cheese Microbiome	"2e13bd36c9"	Food	Parmesan Cheese	165	Italy	https://doi.org/10.1038/s41467-019-09303-w	EBI
Nosocomial CDI	"28fb04fea2"	Human	Stool	50	Canada	http://dx.doi.org/10.1186/2049-2618-1-18	10.1038/s41467-017-01973-8
Periodontitis	"50a7bef1a5"	Human	Oral	91	USA	https://www.nature.com/articles/ismej2011191	Processed
Colorectal Cancer (CRC)	"58aae5f7bc"	Human	Stool	43	China	http://dx.doi.org/10.1371/journal.pone.0039743	10.1038/s41467-017-01973-8
Colorectal Cancer (CRC)	"82483e2035"	Human	Stool	490	Canada and USA	http://dx.doi.org/10.1186/s13073-016-0290-3	10.1038/s41467-017-01973-8
Comparison of Soil and Nematode	"5cb3a79c2a"	Complex Environment	Soil Nematode	54	USA and Belgium	https://onlinelibrary.wiley.com/doi/abs/10.1111/mec.13597	trace.ddbj.nig.ac.jp/DRASearch/study?acc=ERP009665
CDI, non-CDI Diarrhea	"ae8bf7652c"	Human	Stool	336	USA	http://dx.doi.org/10.1128/mBio.01021-14	10.1038/s41467-017-01973-8
Human Microbiome Project (HMP)	"1952ad04a4"	Human	Skin	585	USA	https://www.hmpdacc.org/HM16STR/	https://www.hmpdacc.org/HM16STR/
Autism Spectrum Disorder	"bce002d919"	Human	Stool	39	USA	http://dx.doi.org/10.1371/journal.pone.0068322	10.1038/s41467-017-01973-8
Arabidopsis Root Microbiome	"39d115330a"	Plant and Environment	Soil and Plant	1277	USA	https://doi.org/10.1038/nature11237	EBI
Nonalcoholic Steatohepatitis (NASH)	"ce27ad3634"	Human	Stool	63	USA	http://dx.doi.org/10.1371/journal.pone.0062885	10.1038/s41467-017-01973-8
Obesity Gut Microbiome	"73864fbfb5"	Human	Stool	63	USA	http://dx.doi.org/10.1186/s40168-015-0072-y	10.1038/s41467-017-01973-8
Minimal hepatic encephalopathy (MHE)	"69ec259f44"	Human	Stool	77	China	https://insights.ovid.com/pubmed?pmid=23877352	10.1038/s41467-017-01973-8
Colorectal Cancer (CRC)	"da098e21c7"	Human	TumorColon Tissue	88	USA	https://doi.org/10.1186/s13073-015-0177-8	10.1186/s13073-015-0177-8
Volcanic Soil Microbiome	"0e2f3921b1"	Environment	Soil	127	USA	https://www.ncbi.nlm.nih.gov/bioproject/339635	EBI
Wildlife Rodent Microbiome	"88998c82c2"	Rodent	Spleen	1016	West Africa	https://doi.org/10.1128/mSystems.00032-16	10.1128/mSystems.00032-16
Nonalcoholic Steatohepatitis (NASH)	"90aa6c8d96"	Human	Stool	54	China	http://dx.doi.org/10.1371/journal.pone.0062885	10.1038/s41467-017-01973-8
HIV-1 Infection	"5f4d7c1b50"	Human	Stool	55	USA	https://doi.org/10.1016/j.chom.2013.08.006	10.1038/s41467-017-01973-8
Colorectal Cancer (CRC)	"91199e2dda"	Human	Stool	90	Canada and USA	http://dx.doi.org/10.1158/1940-6207.CAPR-14-0129	10.1038/s41467-017-01973-8
IBD Children	"dc95d886a8"	Human	Stool	91	USA	http://dx.doi.org/10.1371/journal.pone.0039242	10.1038/s41467-017-01973-8
